# Supplementary material for: Molecular and Anti-Microbial Resistance (AMR) Profiling of Methicillin-Resistant Staphylococcus aureus (MRSA) from Hospital and Long-Term Care Facilities (LTCF) Environment
Source: MDPI journal article supplement (doi:10.3390/antibiotics10060748), 2021-06-21
Supplement: s1 [file s1]

Supplementary

# Molecular and Anti-Microbial Resistance (AMR) Profiling of Methicillin-Resistant *Staphylococcus aureus* (MRSA) from Hospital and Long-Term Care Facilities (LTCF) Environment

Bing-Mu Hsu <sup>1,11,†</sup>, Jung-Sheng Chen <sup>2</sup>, I-Ching Lin <sup>3,4,†</sup>, Gwo-Jong Hsu <sup>5,†</sup>, Suproakash Koner <sup>1,6,†</sup>, Bashir Hussain <sup>1,6</sup>, Shih-Wei Huang <sup>7,8</sup> and Hsin-Chi Tsai <sup>9,10,\*</sup>

Table S1. Details of samples location, source, types and number.

| Sampling Location                         | Sampling source               | Sample types                                | Number of samples | Total Samples |
|-------------------------------------------|-------------------------------|---------------------------------------------|-------------------|---------------|
| Changhua city                             | LTCF environment              | Moist samples                               | 45                | 69            |
|                                           |                               | Arid sample                                 | 24                |               |
|                                           | LTCF residents                | Foley catheter-balloons from LTCF residents | 30                | 63            |
|                                           |                               | Nasogastric tubes from LTCF residents       | 15                |               |
|                                           |                               | Tracheostomy tubes from LTCF residents      | 18                |               |
|                                           |                               |                                             |                   |               |
|                                           | Hospital environment          | Outpatient floor                            | 18                | 32            |
|                                           |                               | Inpatient floor                             | 7                 |               |
|                                           |                               | Ward (used)                                 | 7                 |               |
|                                           | Changhua city's total samples |                                             |                   | 164           |
| Chiayi city                               | LTCF environment              | Mild area                                   | 26                | 50            |
|                                           |                               | Severe area                                 | 24                |               |
|                                           | Hospital environment          | Outpatient building 1F                      | 7                 | 32            |
|                                           |                               | Inpatient building 1F                       | 6                 |               |
|                                           |                               | Ward (vacant)                               | 9                 |               |
|                                           |                               | Ward (used)                                 | 10                |               |
|                                           |                               | Total Chiayi city samples                   |                   |               |
| Total Changhua city & Chiayi city samples |                               |                                             | 246               |               |

**Table S2.** MRSA strain identification (ERIC- PCR), *SCCmec* typing and enterotoxin gene detection condition of PCR with primers information.

| Target gene                                                                                                                          | Size                                   | Sequence (5' to 3')                                                                                                                                                                                                        | Reaction Materials (Final Volume: 25 µl)                                                                                                                                                  | PCR Condition                                                                                                                                                                                                                                                                                | References |
|--------------------------------------------------------------------------------------------------------------------------------------|----------------------------------------|----------------------------------------------------------------------------------------------------------------------------------------------------------------------------------------------------------------------------|-------------------------------------------------------------------------------------------------------------------------------------------------------------------------------------------|----------------------------------------------------------------------------------------------------------------------------------------------------------------------------------------------------------------------------------------------------------------------------------------------|------------|
| <i>nuc</i><br><i>mecA</i>                                                                                                            | 270<br>448                             | nuc-F 5'-<br>GCGATTGAT<br>GGTGATAC-<br>GGTT-3'<br>nuc-R 5'-<br>AGCCAA-<br>GCCTTGAC-<br>GAACTAAAG<br>C-3'<br>mecA-F 5'-<br>CTCAGGTAC<br>TGC-<br>TATCCACC-3'<br>mecA-R 5'-<br>CACTTGG-<br>TATATCTTC<br>ACC-3'                | DNA: 100-300<br>ng<br>Primer: 400 nM<br>nuc FR &<br>mecA FR<br>Master mix: 5<br>µl                                                                                                        | Pre-denatura-<br>tion: 95°C 5<br>min<br>Denaturation:<br>94°C 60s<br>Annealing:<br>55°C 60s<br>Extension:<br>72°C 60s<br>D.A.E. Cycles:<br>30 cycles<br>Final extension:<br>72°C 10 min                                                                                                      | [1,2]      |
| ERIC                                                                                                                                 | ----                                   | ERIC1R: 5'-<br>ATGTAA-<br>GCTCCTGGG-<br>GATTCAC-3'<br>ERIC2: 5'-<br>AAGTAAGTG<br>ACTGGGGTG<br>AGCG-3'                                                                                                                      | DNA: 100-300<br>ng<br>Primer: 500 nM<br>ERIC1R &<br>ERIC2<br>Master mix: 5 µ                                                                                                              | Denaturation-1:<br>95°C 5 min<br>Annealing-1:<br>36°C 1 min<br>Extension-1:<br>72°C 4 min<br>D.A.E.-1 Cy-<br>cles: 1 cycle<br>Denaturation-2:<br>95°C 1 min<br>Annealing-2:<br>36°C 1 min<br>Extension-2:<br>72°C 4 min<br>D.A.E.-2 Cy-<br>cles: 35 cycles<br>Final extension:<br>72°C 8 min | [3]        |
| <i>SCCmec</i> I<br><i>SCCmec</i> II<br><i>SCCmec</i> II, III<br><i>SCCmec</i> III<br><i>SCCmec</i> III<br><i>SCCmec</i> I, II,<br>IV | 495<br>284<br>209<br>243<br>414<br>342 | CIF2 F2: 5'-<br>TTCGAGTT-<br>GCTGATGAA<br>GAAGG-3'<br>CIF2 R2: 5'-<br>ATTTAC-<br>CACAAGGAC<br>TACCAGC-3'<br>KDP F1: 5'-<br>AATCATCTG<br>CCATT-<br>GGTGATGC-<br>3'<br>KDP R1: 5'-<br>CGAATGAAG<br>TGAAA-<br>GAAAGTGG-<br>3' | DNA: 100-300<br>ng<br>Primer:<br>400 nM CIF-<br>FR,<br>200 nM KDP-<br>FR,<br>200 nM<br>RIFF3R9<br>400 nM MECI-<br>FR,<br>400 nM<br>RIFF10R13,<br>800 nM DCS-<br>FR<br>Master mix: 5<br>µl | Pre-denatura-<br>tion: 94°C 4<br>min<br>Denaturation:<br>94°C 30s<br>Annealing:<br>53°C 30s<br>Extension:<br>72°C 1 min<br>D.A.E. Cycles:<br>30 cycles<br>Final extension:<br>72°C 4 min                                                                                                     | [4]        |

|          |     |                                                                                                                                                                                                                                                                                                                                                                                                                                             |                                                                     |                                                                                                                                                                                                                                                                                                                                     |     |
|----------|-----|---------------------------------------------------------------------------------------------------------------------------------------------------------------------------------------------------------------------------------------------------------------------------------------------------------------------------------------------------------------------------------------------------------------------------------------------|---------------------------------------------------------------------|-------------------------------------------------------------------------------------------------------------------------------------------------------------------------------------------------------------------------------------------------------------------------------------------------------------------------------------|-----|
|          |     | MECI P2: 5'-<br>ATCAA-<br>GACTT-<br>GCATTCAGG<br>C-3'<br>MECI P3: 5'-<br>GCGGTTTCA<br>ATTCACTT-<br>GTC-3'<br>RIF F3: 5'-<br>GTGATTGTT<br>CGAGA-<br>TATGTGG-3'<br>RIF R9: 5'-<br>CGCTTTATCT<br>GTATCTATC<br>GC-3'<br>RIF F10: 5'-<br>TTCTTAAGT<br>ACAC-<br>GCTGAATCG-<br>3'<br>RIF R13: 5'-<br>GTCACAG-<br>TAATTCCAT<br>CAATGC-3'<br>DCS F2: 5'-<br>CATCC-<br>TATGA-<br>TAGCTT-<br>GGTC-3'<br>DCS R1: 5'-<br>CTAAATCAT<br>AGCCATGAC<br>CG-3' |                                                                     |                                                                                                                                                                                                                                                                                                                                     |     |
| SCCmec V | 325 | Type V-F:<br>5'-GAACATT-<br>GTTACTTAA<br>ATGAGCG-3'<br>Type V-R: 5'-<br>TGAAAGTT-<br>GTACCCTT-<br>GACACC-3'                                                                                                                                                                                                                                                                                                                                 | DNA: 100-300<br>ng<br>Primer:<br>100 nM V-FR<br>Master mix: 5<br>μl | Pre-denatura-<br>tion: 94°C 5<br>min<br>Denaturation-1:<br>94°C 45s<br>Annealing-1:<br>65°C 45s<br>Extension-1:<br>72°C 1.5 min<br>D.A.E.-1 Cy-<br>cles: 10 cycles<br>Denaturation-2:<br>94°C 45s<br>Annealing-2:<br>55°C 45s<br>Extension-2:<br>72°C 1.5 min<br>D.A.E.-2 Cy-<br>cles: 25 cycles<br>Final extension:<br>72°C 10 min | [5] |
| PVL      | 433 | PVL-1: 5'-<br>ATCATT-<br>AGGTAAAAT                                                                                                                                                                                                                                                                                                                                                                                                          | DNA:100-300<br>ng<br>Primer: 400 nM<br>FR                           | Pre-denatura-<br>tion: 94°C 5<br>min                                                                                                                                                                                                                                                                                                | [6] |

|        |     |                                                       |                                                                          |                                                                                                                                                   |
|--------|-----|-------------------------------------------------------|--------------------------------------------------------------------------|---------------------------------------------------------------------------------------------------------------------------------------------------|
|        |     | GTCTG-<br>GACATGATC<br>CA-3'                          | Master mix: 5<br>μl                                                      | Denaturation:<br>94°C 40s<br>Annealing:<br>53°C 40s<br>Extension:<br>72°C 1 min<br>D.A.E. Cycles:<br>35 cycles<br>Final extension:<br>72°C 10 min |
|        |     | entA-F: 5'-<br>TTGGAAC-<br>GGTAAAAAC<br>GAA-3'        |                                                                          |                                                                                                                                                   |
|        |     | entA-R: 5'-<br>GAAC-<br>CTTCCCATC<br>AAAAACA-3'       |                                                                          |                                                                                                                                                   |
|        |     | entB-F: 5'-<br>TCG-<br>CATCAAAC<br>GACAAACG-<br>3'    |                                                                          | Pre-denatura-<br>tion: 94°C 5<br>min                                                                                                              |
|        |     | entB-R: 5'-<br>GCAGGTACT<br>CTATAAGTG<br>CC-3'        |                                                                          | Denaturation:<br>94°C 1 min                                                                                                                       |
|        |     | entC-F: 5'-<br>GGAGGAA-<br>TAACAAAAAC<br>ATGAAGG-3'   |                                                                          | Annealing: 2<br>min                                                                                                                               |
| entA   | 121 | entC-R: 5'-<br>AAAGGCAA-<br>GCAC-<br>CGAAGTAC-<br>3'  | DNA: 100-300<br>ng<br>Primer: 400 nM<br>Primer FR<br>Master mix: 5<br>μl | Extension:<br>72°C 1 min<br>D.A.E. Cycles:<br>35 cycles<br>Final extension:<br>72°C 5 min                                                         |
| entB   | 478 | entD-F: 5'-<br>TGGTGGTGA<br>AATAGA-<br>TAGGAC-3'      |                                                                          | Annealing-<br>Temp.                                                                                                                               |
| entC   | 459 | entD-R: 5'-<br>TGAAGGTGC<br>TCTGTGGA-<br>TAAT-3'      |                                                                          | entA: 50°C<br>entB: 55°C<br>entC: 59°C<br>entD: 51°C<br>entE: 55.5°C                                                                              |
| entD   | 384 | entE-F: 5'-<br>TGG-<br>TAGCGA-<br>GAAAA-<br>GCGAAG-3' |                                                                          | tsst-1: 54°C<br>eta: 54°C<br>etb: 50.9°C                                                                                                          |
| entE   | 495 | entE-R: 5'-<br>TGTAAG-<br>TAATGCCTT-<br>GCCTGAA-3'    |                                                                          |                                                                                                                                                   |
| tsst-1 | 271 | tsst-1-F: 5'-<br>CTGG-<br>TATAGTAG-<br>TGGGTCTG-3'    |                                                                          |                                                                                                                                                   |

[7]

---

tsst-1-R: 5'-AG-  
GTAGTTC-  
TATTGGAG-  
TAGG-3'  
eta-F: 5'-TTT-  
GCTTTCTT-  
GATT-  
GGATTC-3'  
eta-R: 5'-  
GATGTGTT-  
GGTT-  
GATTGAC-3'  
etb-F: 5'-AC-  
GGCTA-  
TATACATTC  
AATT-3'  
etb-R: 5'-  
TCCATCGA-  
TAATATAC-  
CTAA-3'

---

## References

1. Brakstad, O.G.; Aasbakk, K.; Maeland, J.A. Detection of *Staphylococcus aureus* by polymerase chain reaction amplification of the nuc gene. *Journal of clinical microbiology* **1992**, *30*, 1654-1660.
2. Sakoulas, G.; Gold, H.S.; Venkataraman, L.; DeGirolami, P.C.; Eliopoulos, G.M.; Qian, Q. Methicillin-resistant *Staphylococcus aureus*: comparison of susceptibility testing methods and analysis of mecA-positive susceptible strains. *Journal of clinical microbiology* **2001**, *39*, 3946-3951.
3. Ye, Y.; Jiang, Y.; Fan, T.; Jiang, Q.; Cheng, Y.; Lu, J.; Lin, L. Resistance characterization, virulence factors, and ERIC-PCR fingerprinting of *Aeromonas veronii* strains isolated from diseased *Trionyx sinensis*. *Foodborne pathogens and disease* **2012**, *9*, 1053-1055.
4. Oliveira, D.C.; Lencastre, H.d. Multiplex PCR strategy for rapid identification of structural types and variants of the mec element in methicillin-resistant *Staphylococcus aureus*. *Antimicrobial agents and chemotherapy* **2002**, *46*, 2155-2161.
5. Zhang, K.; McClure, J.-A.; Elsayed, S.; Louie, T.; Conly, J.M. Novel multiplex PCR assay for characterization and concomitant subtyping of staphylococcal cassette chromosome mec types I to V in methicillin-resistant *Staphylococcus aureus*. *Journal of clinical microbiology* **2005**, *43*, 5026-5033.
6. Asghar, A.H. Molecular characterization of methicillin-resistant *Staphylococcus aureus* isolated from tertiary care hospitals. *Pakistan journal of medical sciences* **2014**, *30*, 698.
7. Fooladi, A.A.I.; Ashrafi, E.; Tazandareh, S.G.; Koosha, R.Z.; Rad, H.S.; Amin, M.; Soori, M.; Larki, R.A.; Choopani, A.; Hosseini, H.M. The distribution of pathogenic and toxigenic genes among MRSA and MSSA clinical isolates. *Microb Pathogenesis* **2015**, *81*, 60-66.
